# Supplementary material for: Hydrogen spillover on Rh/TiO2: the FTIR study of donated electrons, co-adsorbed CO and H/D exchange
Source: Royal Society of Chemistry journal article supplement (doi:10.1039/c5cp03148f), 2015-01-01
Supplement: c5cp03148f1.pdf [file c5cp03148f1.pdf]

## Supporting Information

### Hydrogen Spillover on Rh/TiO<sub>2</sub>: FTIR Study of Donated Electrons, Coadsorbed CO and H/D Exchange

D. Panayotov,<sup>1\*</sup> E. Ivanova,<sup>2</sup> M. Mihaylov,<sup>2</sup> K. Chakarova,<sup>2</sup> T. Spasov,<sup>1</sup> and K.  
Hadjiivanov<sup>2\*</sup>

<sup>1</sup> *University of Sofia, Department of Chemistry and Pharmacy, Sofia 1126, Bulgaria*

<sup>2</sup> *Institute of General and Inorganic Chemistry, Bulgarian Academy of Sciences, Sofia 1113,  
Bulgaria*

(\*) corresponding authors: dapanayotov@hotmail.com , [kih@svr.igic.bas.bg](mailto:kih@svr.igic.bas.bg)

#### SI A. Characterization of Rh/TiO<sub>2</sub> samples. Background spectra

##### *Activated TiO<sub>2</sub> and Rh/TiO<sub>2</sub> samples*

The transmission IR spectrum of as activated reference TiO<sub>2</sub> sample (Figure S1, spectrum *a*) exhibits a limited amount of isolated surface Ti–OH groups. The bands appearing at 3719, 3690 and 3670 cm<sup>-1</sup> (spectrum *a* in the inset of Figure S1) well agree with previously reported spectra of activated TiO<sub>2</sub>.<sup>1-3</sup> The absence of bands in the regions of  $\delta(\text{HOH})$  modes ( $\sim 1630$  cm<sup>-1</sup>) and H-bonded hydroxyls (3600 – 3000 cm<sup>-1</sup>) indicates that the activated TiO<sub>2</sub> sample was highly dehydroxylated.

The FTIR transmission spectrum of 1.3 wt.% Rh/TiO<sub>2</sub> sample (Figure S1, spectrum *b*) shows a progressively increasing background absorbance for wavenumbers higher than 1800 cm<sup>-1</sup>. We attribute this spectral change (as compared to pure TiO<sub>2</sub> sample) to the presence of deposited Rh nanoparticles that cause wavenumber-dependent dispersion of IR photons. The IR spectrum in the region of  $\nu(\text{OH})$  vibrations (spectrum *b* in the inset of Figure S1) is close to that of the reference TiO<sub>2</sub> sample. These results suggest that loading of Rh nanoparticles onto TiO<sub>2</sub> hardly affect the hydroxyl coverage of the TiO<sub>2</sub> support.

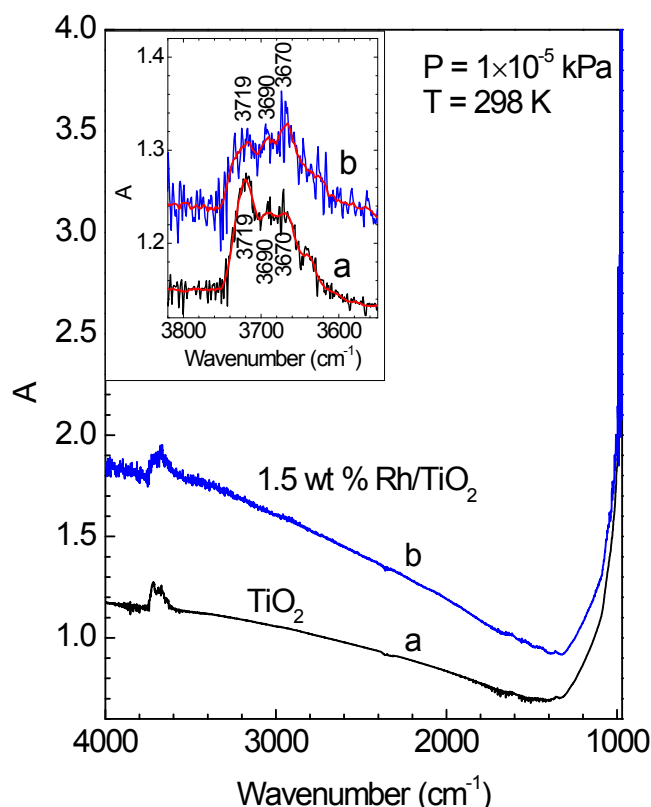

**Figure S1.** Transmission FTIR spectra of as activated  $\text{TiO}_2$  and  $\text{Rh/TiO}_2$  samples; The inset: spectra in the region of isolated surface Ti–OH groups.

### *$\text{H}_2$ -reduced $\text{Rh/TiO}_2$ sample*

The IR spectrum of the  $\text{H}_2$ -reduced  $\text{Rh/TiO}_2$ , registered in presence of gaseous  $\text{H}_2$  (Figure S2 A, spectrum *b*) is characterized by an enormous IR background absorbance observed throughout the whole 4000 – 1000  $\text{cm}^{-1}$  range. This strong featureless mid-IR absorbance was attributed to free and shallow trapped electrons in  $\text{TiO}_2$ , as previously reported for  $\text{TiO}_2$  reduced via high temperature treatment (923 K) *in vacuo*.<sup>2,4</sup> In both cases, extra electrons are accumulated in  $\text{TiO}_2$  due to lattice oxygen extraction via interaction with  $\text{H}_2$  or thermal activation, respectively, (see the next section for more details). Subsequent evacuation of  $\text{Rh/TiO}_2$  sample at 523 K (spectrum *c* in Figure S2 A) resulted in a substantial decrease in the IR background absorbance due to depletion of charges via recombination or deep trapping.<sup>2</sup>

However, the initial background absorbance (spectrum *a* in Figure S2 A) was fully restored only after addition of molecular oxygen (spectrum not shown). Oxygen has strong affinity to electrons and when adsorbed (even at room temperature) it depletes the residual free and ST electrons from the  $\text{TiO}_2$ .<sup>5</sup> These observations evidence the electronic character of

observed profound increase in the IR background absorbance of reduced  $\text{TiO}_2$ . The spectrum of  $\text{H}_2$ -reduced sample also showed a slight increase in the intensity of bands attributed to surface OH groups and adsorbed water.

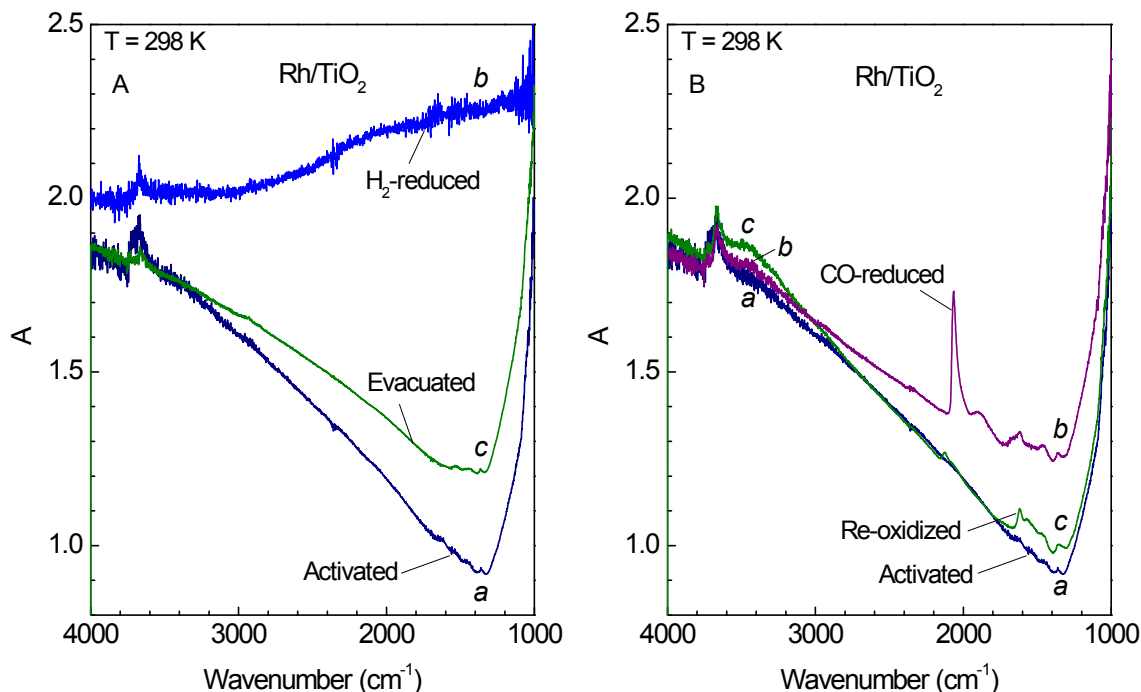

**Figure S2.** Transmission FTIR spectra of  $\text{Rh/TiO}_2$  samples obtained after activation,  $\text{H}_2$  and CO reduction and partial re-oxidation in  $\text{O}_2$ . See the experimental section for detailed description of these treatments. Panel A: spectra of (a) activated, (b)  $\text{H}_2$ -reduced and (c) evacuated (following b)  $\text{Rh/TiO}_2$  samples. Panel B: spectra of (a) activated, (b) CO-reduced and (c) re-oxidized (following b)  $\text{Rh/TiO}_2$  samples.

### ***CO-reduced $\text{Rh/TiO}_2$ sample***

Reduction of activated  $\text{Rh/TiO}_2$  sample with CO gas at 523 K caused analogous but much lower increase in the IR background absorbance (Figure S2 B, spectrum b) as compared to that obtained via  $\text{H}_2$  reduction (Figure S2 A, spectrum b). This indicated that (i) the reduction process is mainly associated with the supported Rh phase and (ii) the reduction of the  $\text{TiO}_2$  support is limited in absence of hydrogen. Other consequences of CO reduction were the appearance of (i) strong bands at 2065 and 1900  $\text{cm}^{-1}$  belonging to linear  $\text{Rh}^0\text{-CO}$  and bridged  $\text{Rh}_x^0\text{-CO}$  species, respectively, formed on the surface of reduced Rh crystallites;<sup>6</sup> and (ii) bands in the 1560 – 1360  $\text{cm}^{-1}$  spectral region that were associated with carbonate structures formed on the  $\text{TiO}_2$  support.<sup>7-10</sup>

### ***Re-oxidized Rh/TiO<sub>2</sub> sample***

Exposure of CO-reduced Rh/TiO<sub>2</sub> sample to 3 kPa molecular O<sub>2</sub> at 298 K returned immediately the background absorbance to the level of activated sample, as revealed by the comparison of spectra *c* and *a* in Figure S2 B. In this case, the carbonate bands gained some intensity.

### ***SI B. Characterization of Rh/TiO<sub>2</sub> samples. Spectra of adsorbed CO***

Figure S3 summarizes the spectra in the carbonyl-stretching region obtained with differently pre-treated samples after exposure to gas-phase CO and evacuation.

#### ***Activated Rh/TiO<sub>2</sub> and TiO<sub>2</sub> samples***

The IR spectra of both activated Rh/TiO<sub>2</sub> and TiO<sub>2</sub> samples obtained immediately after introduction of 4 kPa CO (spectra *a* and *a'*, respectively, in Figure S3 A) showed a band at 2186 cm<sup>-1</sup> indicating the formation of carbonyls linearly bound at coordinatively unsaturated Ti sites (Ti<sup>4+</sup><sub>(CUS)</sub>) on TiO<sub>2</sub> surface.

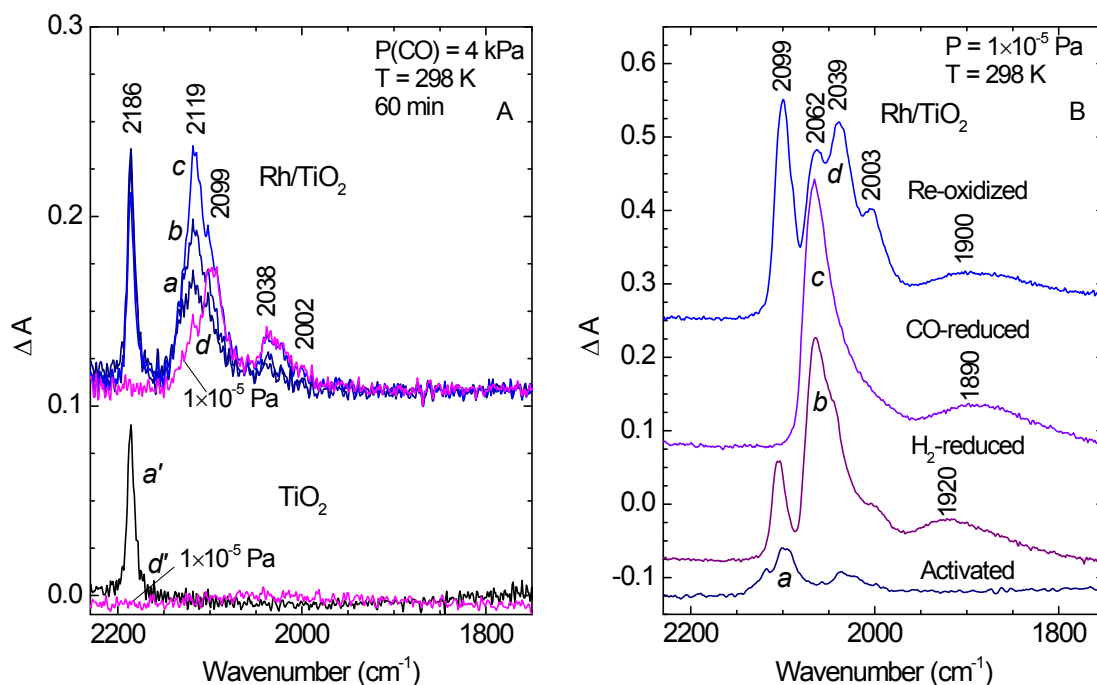

**Figure S3.** Difference IR spectra of CO probe molecule adsorbed on: (A) activated TiO<sub>2</sub> and Rh/TiO<sub>2</sub> samples; (B) Reduced and re-oxidized Rh/TiO<sub>2</sub> samples. The samples were first saturated with CO and then evacuated at 298 K to  $P = 1 \times 10^{-5}$  Pa.

These carbonyl species were unstable and disappeared under evacuation at room temperature (spectra *d* and *d'*). Carbon monoxide weakly bound to ionic  $\text{Rh}^{n+}$  ( $n = 2$  or  $3$ ) sites on oxidized rhodium crystallites was detected at  $2119\text{ cm}^{-1}$ .<sup>11,12</sup> The intensity of this band slowly increased with the time of CO exposure (spectra *a–c* in Figure S3 A) indicating that oxidized  $\text{Rh}^{n+}$  sites were not accessible for CO adsorption on the activated  $\text{Rh}/\text{TiO}_2$ . The doublet appearing at  $2099$  and  $2038\text{ cm}^{-1}$  was assigned to symmetric and antisymmetric vibrations of isolated geminal dicarbonyls,  $\text{Rh}^{\text{I}}(\text{CO})_2$ .<sup>13–16</sup> The linear (or mono) carbonyls of  $\text{Rh}^{n+}$  were unstable and their concentration decreased upon decreasing the equilibrium pressure of CO and evacuation. As expected,<sup>13–16</sup> the  $\text{Rh}^{\text{I}}(\text{CO})_2$  species resisted evacuation (spectrum *d*). Their characteristic bands even slightly increased in intensity suggesting reduction of some  $\text{Rh}^{n+}$  species to  $\text{Rh}^+$  during the experiments. Thus, the activated  $\text{Rh}/\text{TiO}_2$  sample exhibited cationic, but no metallic rhodium sites. The overall intensity of the carbonyl bands with this sample pre-treatment is weak which suggests that some  $\text{Rh}^{n+}$  sites are coordinatively saturated and are thus not able to coordinate CO.

### ***H<sub>2</sub>-reduced Rh/TiO<sub>2</sub> sample***

The spectrum of CO adsorbed on  $\text{H}_2$ -reduced  $\text{Rh}/\text{TiO}_2$  sample that was pre-evacuated at  $298\text{ K}$  (Figure S3 B, spectrum *b*) showed an intense band at  $2064\text{ cm}^{-1}$  unambiguously assigned to linear  $\text{Rh}^0\text{--CO}$  species and a broad band at  $1920\text{ cm}^{-1}$  characteristic of bridged  $\text{Rh}_x^0\text{--CO}$  carbonyls.<sup>16,17,18</sup> In addition, a band at  $2099\text{ cm}^{-1}$  was registered and attributed to the symmetric modes of isolated  $\text{Rh}^{\text{I}}(\text{CO})_2$  geminal species,<sup>14,16,17,19</sup> the respective antisymmetric modes (the shoulder at  $\sim 2040\text{ cm}^{-1}$ ) are masked by the intense band of  $\text{Rh}^0\text{--CO}$ . These data indicated that the metallic Rh particles obtained through  $\text{H}_2$ -reduction were easily disrupted upon CO adsorption to give isolated Rh(I) geminal dicarbonyls, as widely discussed in the literature.<sup>14,16,17</sup>

### ***CO-reduced Rh/TiO<sub>2</sub> sample***

The CO-reduced  $\text{Rh}/\text{TiO}_2$  sample was first saturated with CO ( $4\text{ kPa CO}$  at  $298\text{ K}$ , for  $120\text{ min}$ ). After evacuation at  $298\text{ K}$ , the sample was almost fully covered with CO, i.e.  $\theta_{\text{CO}} = 0.9$ , as shown in Figure S3 B, spectrum *c*. The spectrum confirmed the presence of only metallic  $\text{Rh}^0$  sites. The band at  $2065\text{ cm}^{-1}$  is due to linear  $\text{Rh}^0\text{--CO}$  species, while the wide band centered at  $1890\text{ cm}^{-1}$  is attributed to bridged  $\text{Rh}_2^0\text{CO}$  species, as previously reported.<sup>6,16,17</sup> No geminal dicarbonyl species bound to isolated Rh cations were detected for this CO-reduced  $\text{Rh}/\text{TiO}_2$ , which indicates that rhodium particles on the sample were highly

resistant to the corrosive action of CO. This implies formation of metallic Rh nanoparticles with low concentration of defect sites.<sup>6</sup>

### ***Re-oxidized Rh/TiO<sub>2</sub> sample***

Re-oxidation of CO-reduced Rh/TiO<sub>2</sub> sample with O<sub>2</sub> strongly promoted the formation of isolated Rh<sup>I</sup>(CO)<sub>2</sub> geminal species after subsequent CO adsorption (Figure S3 B, spectrum *d*). The pair of bands at 2099 and 2039 cm<sup>-1</sup> is due to isolated Rh<sup>I</sup>(CO)<sub>2</sub> species.<sup>14-19</sup> The bands appearing at 2062 and 1900 cm<sup>-1</sup> are attributed to linear Rh<sup>0</sup>CO and bridging Rh<sup>0</sup><sub>x</sub>CO species, respectively, formed on metallic Rh<sup>0</sup> sites.<sup>14-19</sup> An estimate based on the integrated absorbance of linear carbonyls showed that about 50% of metallic Rh was converted into oxidized Rh species. Therefore, a substantial part of Rh sites adsorbing CO remained in metallic Rh<sup>0</sup>-state on this re-oxidized Rh/TiO<sub>2</sub> sample. The band at 2003 cm<sup>-1</sup> was more difficult to assign. Guglielminotti and Boccuzzi<sup>20</sup> attributed a similar band to Rh<sup>+</sup>(Cl)-CO species. Our data do not support this assignment because the band was detected only with the re-oxidized sample. A carbonyl band at 2017 cm<sup>-1</sup> was assigned to Rh<sup>+</sup>-(CO)-Rh<sup>+</sup> species.<sup>21</sup> Note that gem dicarbonyls are observed at 2075 and 2000 cm<sup>-1</sup> with Rh/MgO<sup>22</sup> and at 2109 and 2000 cm<sup>-1</sup> with Rh/X zeolite.<sup>23</sup> Therefore, it seems that the 2003 cm<sup>-1</sup> band is due to geminal dicarbonyls that are not isolated on the support, but probably formed on Rh<sup>+</sup> sites at the periphery of metal particles.

### **SI C. TEM and HRTEM images of Rh/TiO<sub>2</sub> sample**

TEM study of ex-situ CO-reduced Rh/TiO<sub>2</sub> sample (Figure S4 A) revealed decoration of TiO<sub>2</sub> particles (average size 25 nm) by pseudo-hemispherical Rh nanoparticles that have a narrow distribution of particles sizes with mean diameter  $d_p \approx 2.2$  nm.<sup>6</sup> HRTEM study of Rh/TiO<sub>2</sub> sample showed (Figure S4 B and C) that Rh nanoparticles with different exposed faces are preferentially grown on different TiO<sub>2</sub> crystal planes. Lattice fringes (101) of anatase TiO<sub>2</sub> coexisted with (111) lattice fringes of rhodium while lattice fringes (100) of anatase coexisted with (100) lattice fringes of rhodium.

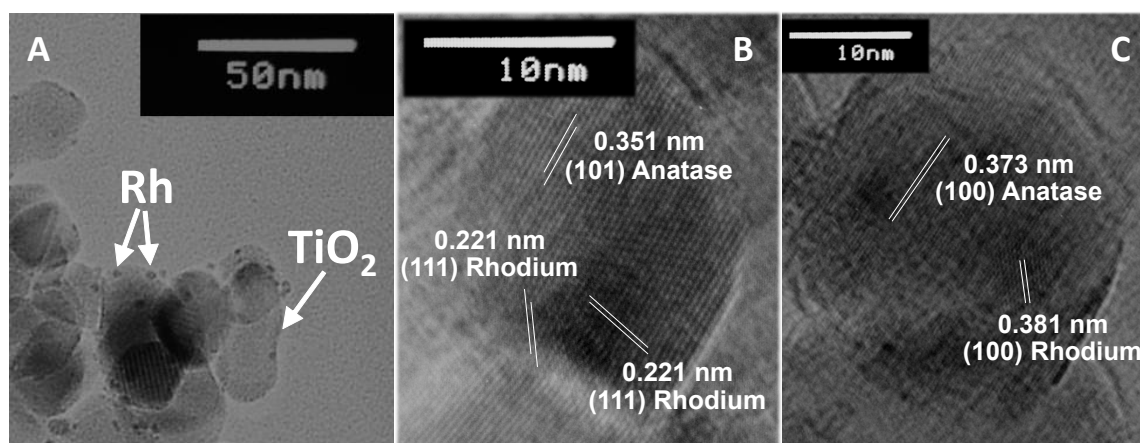

**Figure S4.** (A) Bright field TEM image of the 1.3 wt. % Rh/TiO<sub>2</sub> sample. (B) and (C) HRTEM images of ~ 25 nm anatase particles bearing ~ 2–3 nm Rh particles.

## References

- (1) Szczepankiewicz, S. H.; Moss, J. A.; Hoffmann, M. R. *J. Phys. Chem. B* **2002**, *106*, 7654.
- (2) Panayotov, D. A.; Yates Jr, J. T. *Chem. Phys. Lett.* **2005**, *410*, 11.
- (3) Panayotov, D. A.; Morris, J. R. *J. Phys. Chem. C* **2009**, *113*, 15684.
- (4) Panayotov, D. A.; Burrows, S. P.; Morris, J. R. *J. Phys. Chem. C* **2012**, *116*, 4535.
- (5) Berger, T.; Sterrer, M.; Diwald, O.; Knözinger, E.; Panayotov, D.; Thompson, T. L.; Yates Jr, J. T. *J. Phys. Chem. B* **2005**, *109*, 6061.
- (6) Panayotov, D.; Mihaylov, M.; Nihtianova, D.; Spassov, T.; Hadjiivanov, K. *PCCP* **2014**, *16*, 13136.
- (7) Hadjiivanov, K. *Appl. Surf. Sci.* **1998**, *135*, 331.
- (8) Binet, C.; Daturi, M.; Lavalley, J.-C. *Catal. Today* **1999**, *50*, 207.
- (9) Martra, G. *Appl. Catal. A* **2000**, *200*, 275.
- (10) Venkov, T.; Fajerwerg, K.; Delannoy, L.; Klimev, H.; Hadjiivanov, K.; Louis, C. *Appl. Catal. A* **2006**, *301*, 106.
- (11) Wey, J. P.; Neely, W. C.; Worley, S. D. *J. Catal.* **1992**, *134*, 378.
- (12) Frank, M.; Kühnemuth, R.; Bäumer, M.; Freund, H. J. *Surf. Sci.* **1999**, 427–428, 288.
- (13) Yates, J. J. T.; Duncan, T. M.; Worley, S. D.; Vaughan, R. W. *J. Chem. Phys.* **1979**, *70*, 1219.
- (14) Basu, P.; Panayotov, D.; Yates, J. T. *J. Am. Chem. Soc.* **1988**, *110*, 2074.
- (15) Solymosi, F.; Knozinger, H. *J. Chem. Soc., Faraday Trans.* **1990**, *86*, 389.
- (16) Zhang, Z. L.; Kladi, A.; Verykios, X. E. *J. Mol. Catal.* **1994**, *89*, 229.
- (17) Buchanan, D. A.; Hernandez, M. E.; Solymosi, F.; White, J. M. *J. Catal.* **1990**, *125*, 456.
- (18) Sean, M. M.; Lundwall, M.; Yang, F.; Zhou, Z.; Goodman, D. W. *J. Phys.: Condens. Matter* **2009**, *21*, 474223.
- (19) Solymosi, F.; Pasztor, M. *J. Phys. Chem.* **1986**, *90*, 5312.
- (20) Guglielminotti, E.; Boccuzzi, F. *J. Mol. Catal. A: Chem.* **1996**, *104*, 273.
- (21) Trautmann, S.; Baerns, M. *J. Catal.* **1994**, *150*, 335.

- (22) Gutschick, D.; Miessner, H. *React. Kinet. Catal. Lett.* **1984**, 26, 387.
- (23) Yamanis, J.; Yang, K.-C. *J. Catal.* **1981**, 69, 498.
